# Supplementary material for: Surface plasmon resonance-based immunoassay for human fetuin A
Source: Royal Society of Chemistry journal article supplement (doi:10.1039/c4an00149d), 2014-01-01
Supplement: c4an00149d1.pdf [file c4an00149d1.pdf]

## **Surface plasmon resonance-based immunoassay for human fetuin A**

*Sandeep Kumar Vashist<sup>a,b</sup>, E. Marion Schneider<sup>c</sup>, John H.T. Luong<sup>d</sup>*

<sup>a</sup>HSG-IMIT - Institut für Mikro- und Informationstechnik, Georges-Koehler-Allee 103, 79110 Freiburg, Germany.

<sup>b</sup>Laboratory for MEMS Applications, Department of Microsystems Engineering - IMTEK, University of Freiburg, Georges-Koehler-Allee 103, 79110 Freiburg, Germany

<sup>c</sup>Sektion Experimentelle Anaesthesiologie, University Hospital Ulm, Albert Einstein Allee 23; 89081 Ulm, Germany

<sup>d</sup>Innovative Chromatography Group, Irish Separation Science Cluster (ISSC), Department of Chemistry and Analytical, Biological Chemistry Research Facility (ABCRF), University College Cork, Cork, Ireland

\*Corresponding author e-mail: [sandeep.kumar.vashist@hsg-imit.de](mailto:sandeep.kumar.vashist@hsg-imit.de); Tel.: +49 761 2037252;

Fax: +49 761 20373299

## **Previously developed covalent antibody immobilization procedure<sup>1</sup>**

### *Surface cleaning of SPR Au chip (SIA kit) and APTES functionalization*

The Au chip was cleaned with piranha etch [60  $\mu\text{L}$  of  $\text{H}_2\text{SO}_4$  (97.5%, v/v): 30  $\mu\text{L}$  of  $\text{H}_2\text{O}_2$  (30%, v/v)] for 2 min followed by extensive washing with UPW. The chip was then incubated with 100  $\mu\text{L}$  of 2% (v/v) APTES for 1 h at room temperature (RT) in a fume hood followed by five washes with UPW.

### *EDC activation of anti-HFA antibody*

Anti-HFA Ab (990  $\mu\text{L}$  of 100  $\mu\text{g}/\text{mL}$  in HBS) was incubated at RT for 15 min with 10  $\mu\text{L}$  of cross-linking solution containing EDC (4  $\text{mg}/\text{mL}$ ) and sulfo-NHS (11  $\text{mg}/\text{mL}$ ) in 0.1 M MES buffer, pH 4.7. It leads to the activation of carboxyl groups on anti-HFA Ab with EDC.

### *Antibody immobilization procedure*

Fifty microliters of EDC-activated Ab (100  $\mu\text{g}/\text{mL}$ ) was injected over all four flow cells of an APTES-functionalized Au chip at a flow rate of 10  $\mu\text{L}/\text{min}$  and the baseline was allowed to stabilize. This leads to the covalent binding of EDC-activated anti-HFA Ab on the APTES-functionalized Au chip. Non-specific binding sites on the Ab-bound chip were then blocked by injecting 20  $\mu\text{L}$  of 1% (w/v) BSA at 10  $\mu\text{L}/\text{min}$ .

## **Covalent antibody immobilization procedure on CM5-dextran chip<sup>1</sup>**

A CM5 dextran-functionalized Au chip was docked into the BIAcore 3000 and primed. The optimum pH of sodium acetate buffer for Ab immobilization, as determined by pre-concentration studies, was found to be 4.2. The CM5-dextran chip was activated by injecting a 50  $\mu\text{L}$  cross-linking solution, containing 200  $\mu\text{g}$  of EDC and 550  $\mu\text{g}$  of sulfo-NHS in 0.1M MES buffer, pH 4.7, through all the flow cells at 10  $\mu\text{L}/\text{min}$ . Thereafter, 50  $\mu\text{L}$  of anti-HFA antibody (100  $\mu\text{g}/\text{mL}$ ) was injected in the four flow cells of an APTES-functionalized Au chip

at 10  $\mu\text{L}/\text{min}$  and the baseline was allowed to stabilize. Non-specific binding sites on the chip were then blocked by consecutive injection of 20  $\mu\text{L}$  of 1M ethanolamine hydrochloride, pH 8.5 and 20  $\mu\text{L}$  of 1% (w/v) BSA at 10  $\mu\text{L}/\text{min}$ . Ethanolamine hydrochloride blocked the unreacted ester groups in CM5-dextran matrix, while BSA blocked non-specific binding sites on the chip surface.

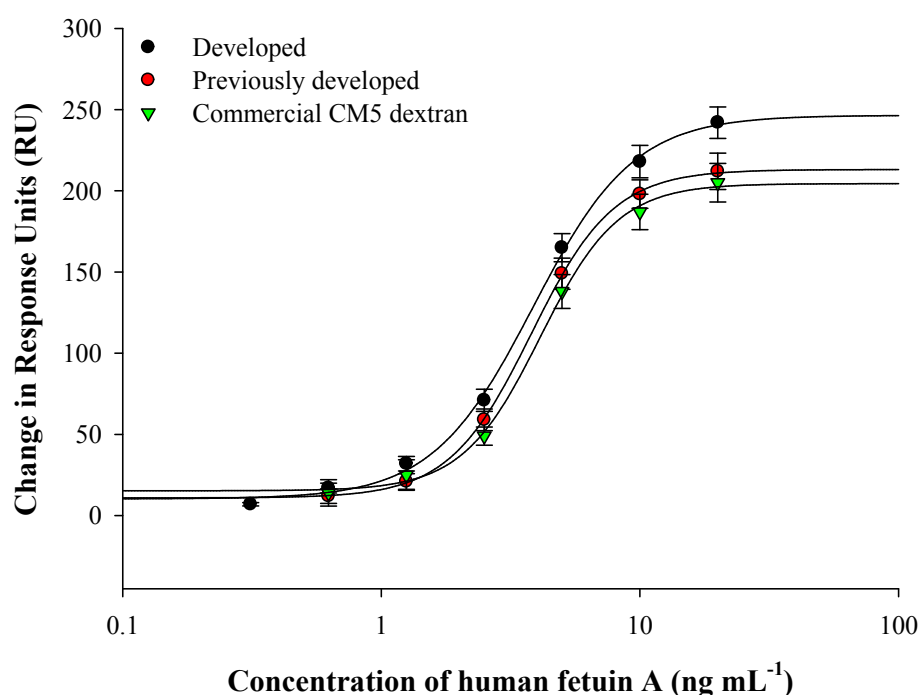

**Fig. S1.** Comparison of the developed SPR IA with our previously developed covalent and commercial carboxymethyl (CM5) dextran chip-based SPR IA formats. All experiments were done in triplicate with the error bars presented the standard deviation.

## REFERENCES

- (1) Vashist S. K.; Dixit, C. K.; MacCraith, B. D.; O’Kennedy, R. *Analyst* 2011, 136, 4431-4435.
